# Supplementary material for: Ethnic Variation in Adiponectin and Leptin Levels and Their Association With Adiposity and Insulin Resistance
Source: PubMed Central journal article supplement — Diabetes Care. 2010 Apr 22;33(7):1629–34. doi: 10.2337/dc09-1392 (PMC2890372; doi:10.2337/dc09-1392), 2010-04-22
Supplement: supp_dc09-1392_onlineappendix.pdf [file supp_dc09-1392_onlineappendix.pdf]

## ONLINE APPENDIX

**Appendix Table 1.** Effect of anthropometric measures on adipokine concentrations, by ethnicity. ¶

|                        | Adiponectin §  |         |           | Leptin §     |         |           |
|------------------------|----------------|---------|-----------|--------------|---------|-----------|
|                        | B (SE)         | P-value | Partial R | B (SE)       | P-value | Partial R |
| European               |                |         |           |              |         |           |
| Body mass index        | -0.04 (0.008)  | <0.0001 | -0.26*    | 0.11 (0.01)  | <0.0001 | 0.53*     |
| Waist circumference    | -0.01 (0.003)  | <0.0001 | -0.27*    | 0.03 (0.004) | <0.0001 | 0.46*     |
| Waist adjusted for hip | -0.01 (0.005)  | 0.02    | -0.13     | 0.01 (0.006) | 0.04    | 0.12      |
| Waist-to-hip ratio     | -1.61 (0.52)   | 0.002   | -0.17‡    | 2.38 (0.71)  | 0.001   | 0.18‡     |
| Chinese                |                |         |           |              |         |           |
| Body mass index        | -0.05 (0.01)   | <0.0001 | -0.27*    | 0.13 (0.01)  | <0.0001 | 0.55*     |
| Waist circumference    | -0.01 (0.003)  | <0.0001 | -0.22*    | 0.03 (0.004) | <0.0001 | 0.40*     |
| Waist adjusted for hip | -0.02 (0.006)  | <0.001  | -0.19 †   | 0.04 (0.007) | <0.0001 | 0.32*     |
| Waist-to-hip ratio     | -1.32 (0.48)   | 0.007   | -0.16‡    | 2.69 (0.60)  | <0.0001 | 0.25*     |
| South Asian            |                |         |           |              |         |           |
| Body mass index        | -0.007 (0.008) | 0.33    | -0.05     | 0.10 (0.009) | <0.0001 | 0.52*     |
| Waist circumference    | -0.002 (0.002) | 0.47    | -0.04     | 0.03 (0.003) | <0.0001 | 0.46*     |
| Waist adjusted for hip | -0.006 (0.005) | 0.24    | -0.07     | 0.04 (0.006) | <0.0001 | 0.32*     |
| Waist-to-hip ratio     | -0.683 (0.47)  | 0.15    | -0.08     | 3.42 (0.66)  | <0.0001 | 0.28*     |
| Aboriginal             |                |         |           |              |         |           |
| Body mass index        | -0.02 (0.004)  | <0.0001 | -0.24*    | 0.09 (0.006) | <0.0001 | 0.68*     |
| Waist circumference    | -0.009 (0.002) | <0.0001 | -0.28*    | 0.04 (0.002) | <0.0001 | 0.70*     |
| Waist adjusted for hip | -0.01 (0.003)  | <0.001  | -0.22 †   | 0.03 (0.005) | <0.0001 | 0.38*     |
| Waist-to-hip ratio     | -1.72 (0.40)   | <0.0001 | -0.25*    | 4.84 (0.69)  | <0.0001 | 0.38*     |

\* P&lt;0.0001; † P&lt;0.001; ‡ P&lt;0.01; § P&lt;0.05

¶ B and partial R values are adjusted for age and sex.

§ Natural log.

**Appendix Table 2.** Independent predictors of insulin resistance (HOMA-IR) using standardized regression coefficients.

| Predictor                          | Univariate                 |         | Multivariate               |         |
|------------------------------------|----------------------------|---------|----------------------------|---------|
|                                    | Standardized coefficient † | P-value | Standardized coefficient † | P-value |
| Ethnicity                          |                            |         |                            |         |
| European                           | Reference                  |         | Reference                  |         |
| South Asian                        | 0.21                       | <0.0001 | 0.19                       | <0.0001 |
| Chinese                            | 0.009                      | 0.78    | 0.15                       | <0.0001 |
| Aboriginal                         | 0.48                       | <0.0001 | 0.23                       | <0.0001 |
| Metabolic factor                   |                            |         |                            |         |
| Adiponectin (ln)                   | -0.30                      | <0.0001 | -0.13                      | <0.0001 |
| Leptin (ln)                        | 0.37                       | <0.0001 | 0.17                       | <0.0001 |
| C-reactive protein (ln)            | 0.45                       | <0.0001 | 0.04                       | 0.23    |
| Age, years                         | 0.19                       | <0.0001 | 0.06                       | 0.01    |
| Female                             | -0.17                      | <0.0001 | -0.10                      | 0.007   |
| Body mass index, kg/m <sup>2</sup> | 0.60                       | <0.0001 | 0.37                       | <0.0001 |
| Waist-to-hip ratio                 | 0.50                       | <0.0001 | 0.17                       | <0.0001 |
| Glycemic index ‡                   | 0.26                       | <0.001  | 0.005                      | 0.87    |
| Physical activity, high            | -0.22                      | <0.0001 | -0.10                      | 0.003   |
| Physical activity, medium          | -0.11                      | 0.005   | -0.04                      | 0.17    |
| Current smoking                    | 0.10                       | 0.002   | -0.02                      | 0.52    |
| Energy intake, kcals/day           | 0.110                      | 0.001   | 0.03                       | 0.24    |

† Z scores have a mean of 0 and a SD of 1, the beta coefficient represents the change in the insulin resistance for an increase in 1 SD in the independent variable.

‡ The results presented in the Table are with glycemic index in the model. A separate model with glycemic load in place of glycemic index produced virtually the same parameter estimates.

**Appendix Table 3.** The coefficients of partial determination (partial R<sup>2</sup>)† indicating the proportion of variance in HOMA-IR ‡ attributable to ethnicity, adipokines, and lifestyle factors.

|                                                                | Partial R <sup>2</sup> | P-value |
|----------------------------------------------------------------|------------------------|---------|
| Ethnic origin<br>[Model 1 <sup>a</sup> vs 2 <sup>b</sup> ]     | 0.115                  | <0.001  |
| Adiponectin ‡<br>[Model 2 <sup>b</sup> vs 3 <sup>c</sup> ]     | 0.038                  | <0.001  |
| Leptin ‡<br>[Model 3 <sup>c</sup> vs 4 <sup>d</sup> ]          | 0.045                  | <0.001  |
| Health Behaviours<br>[Model 4 <sup>d</sup> vs 5 <sup>e</sup> ] | 0.017                  | 0.028   |

† The coefficient of partial determination (partial R<sup>2</sup>) shows the marginal reduction in the variation of Y associated with a new variable X (e.g., ethnicity) which is added to a simpler model that includes other predictors (e.g., age, sex, center, body mass index, and waist-to-hip ratio). For example, a partial R<sup>2</sup> value of 0.115 comparing Model 1 versus Model 2 means that adding ethnicity to the model which already includes age, sex, center, BMI and WHR reduces the variation in HOMA-IR by 11.5%. Corresponding p values for the partial R<sup>2</sup> estimates were determined using the multiple partial F-test.

‡ Natural log.

a Model 1 included the variables age, sex, center, body mass index, and waist-to-hip ratio.

b Model 2 included Model 1 plus ethnicity.

c Model 3 included Model 2 plus Adiponectin.

d Model 4 included Model 3 plus Leptin.

e Model 5 included Model 4 plus physical activity.
